# Supplementary material
Source: publisher figshare collection journal article supplement (https://tandf.figshare.com/articles/dataset/_/7930904)
Supplement: Supplementary file 2 [file 2]

**Table S1** The correlation indexes between parameters and antioxidant activity in SFGHs-ribose system at pH 7.0, 95°C.

| Parameters | OD 294  | OD 420  | FI      | ABTS |
|------------|---------|---------|---------|------|
| OD 294     | 1       |         |         |      |
| OD 420     | 0.992** | 1       |         |      |
| FI         | 0.934** | 0.885** | 1       |      |
| ABTS       | 0.964** | 0.928** | 0.971** | 1    |

\*\* indicates significant at the 0.01 level.

\* indicates significant at the 0.05 level.

FI-Fluorescence intensity, ABTS-ABTS<sup>+</sup> radical scavenging activity.
